# Supplementary material for: Non oxidative and oxidative dehydrogenation of n-octane using FePO4: effect of different FePO4 phases on the product selectivity
Source: Royal Society of Chemistry journal article supplement (doi:10.1039/d0cy01585g), 2020-01-01
Supplement: d0cy01585g1.pdf [file d0cy01585g1.pdf]

### ELECTRONIC SUPPLEMENTARY INFORMATION

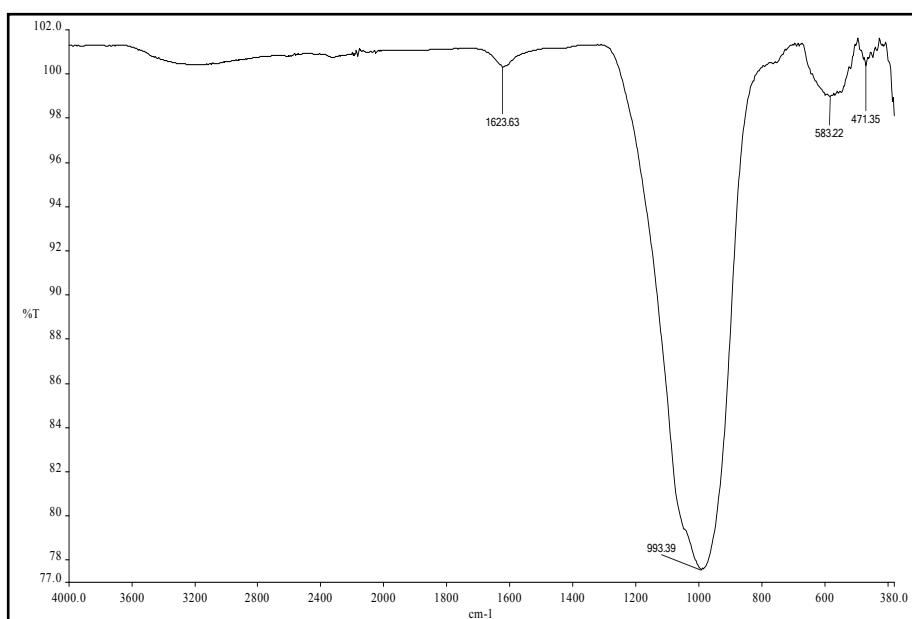

**Figure S1** : IR spectra of FePO<sub>4</sub> catalyst

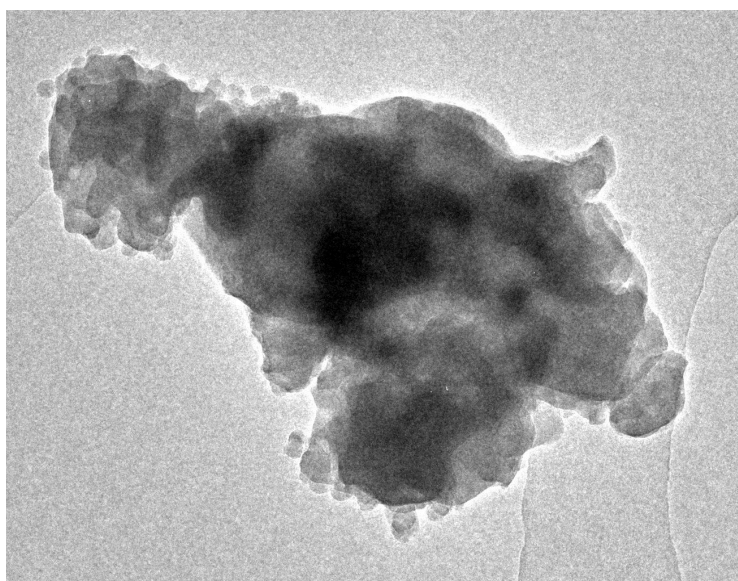

**Figure S2** : TEM micrograph (scale = 100 nm) of FePO<sub>4</sub> catalyst

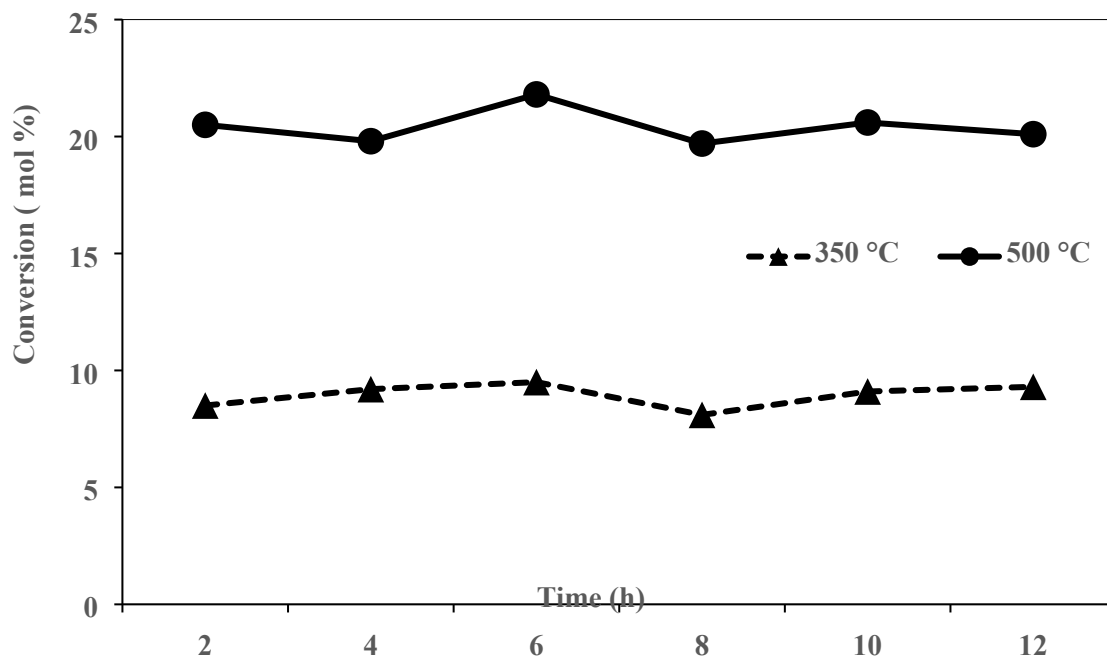

**Figure S3 :** Time on line studies over the fresh catalysts at a temperatures of 350 °C and 550 °C at a carbon to oxygen ratio of 8:3, GHSV = 5000 h<sup>-1</sup>

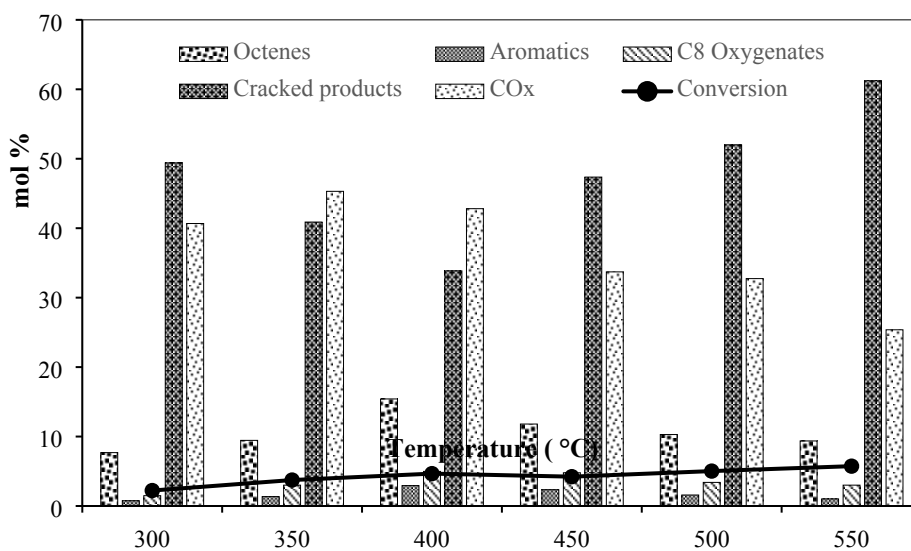

**Figure S4 :** Effect of temperature on the conversion of *n*-octane and selectivity towards products over Fe<sub>2</sub>P<sub>2</sub>O<sub>7</sub> phase at a carbon to oxygen ratio of 8:3, GHSV = 5000 h<sup>-1</sup>

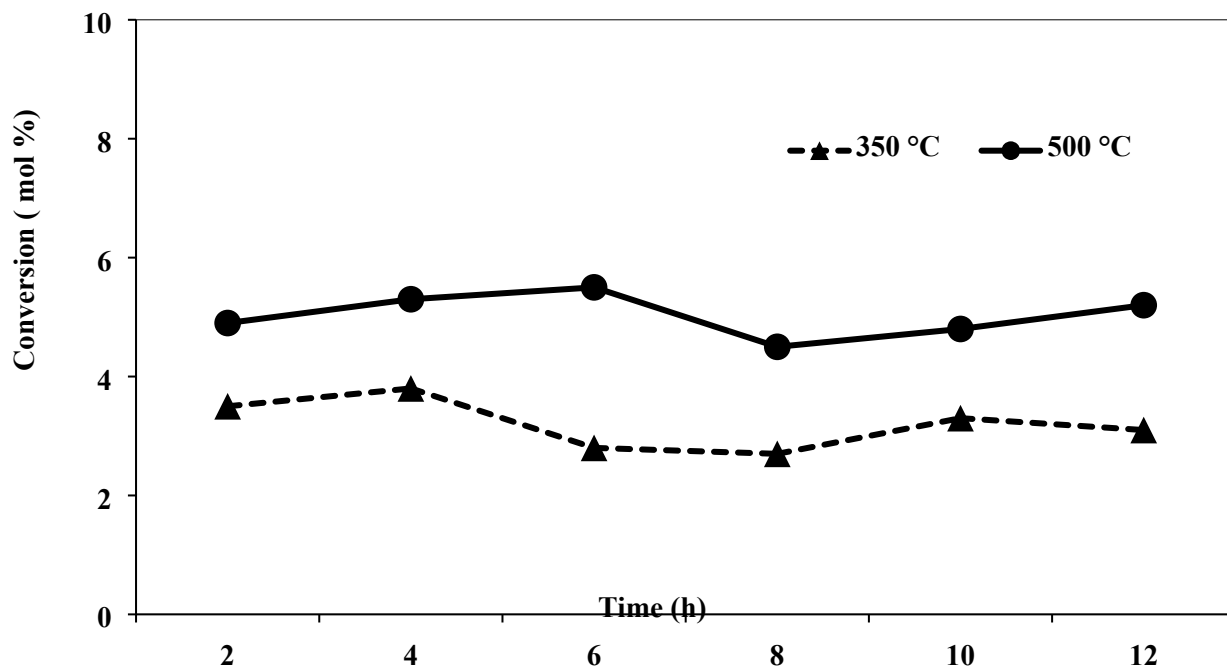

**Figure S5** : Time on line studies over the “deactivated” catalyst catalysts at a temperatures of 350 °C and 550 °C at a carbon to oxygen ratio of 8:3, GHSV = 5000 h<sup>-1</sup>

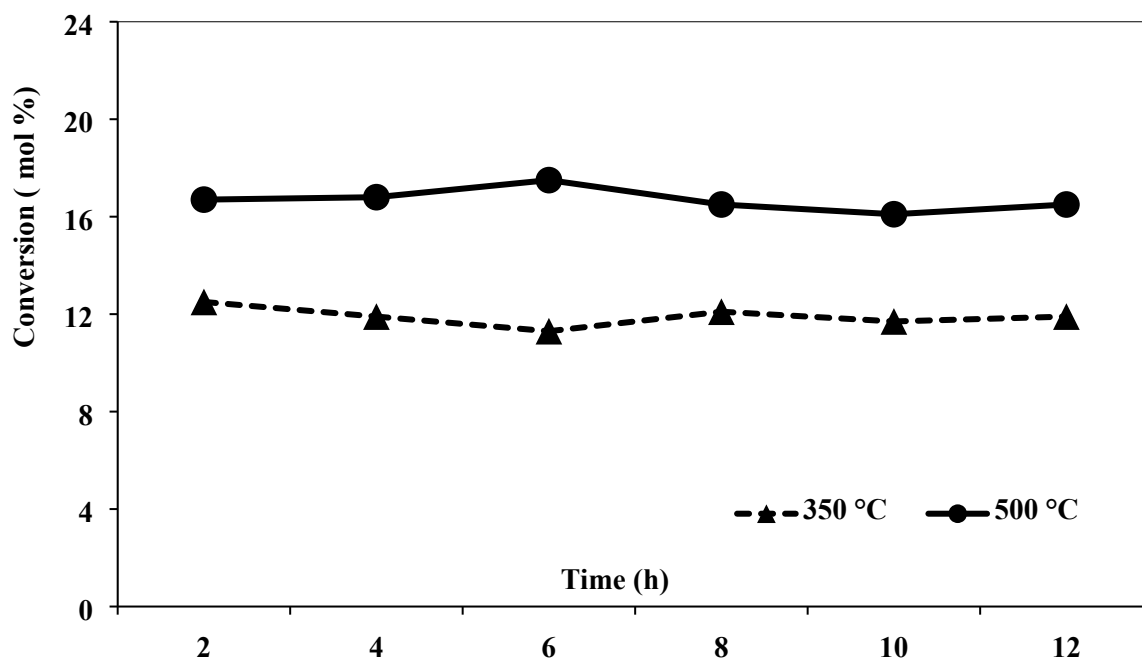

**Figure S6 :** Time on line studies over the “regenerated” catalyst catalysts at a temperatures of 350 °C and 550 °C at a carbon to oxygen ratio of 8:3, GHSV = 5000 h<sup>-1</sup>

## S1: Analysis of products and Calculations:

The products of the catalysed reactions were expressed as conversion, selectivity and yield. Conversion is a measure of the amount of feed introduced into the reactor that is converted into products:

$$\text{Conversion (mol \%)} = \frac{\text{moles of } n\text{-octane in} - \text{moles of } n\text{-octane out}}{\text{moles of } n\text{-octane in}} \times 100$$

The selectivity towards a product may be defined as the ratio of that product formed to the total moles of products formed, based on carbon atoms:

$$\text{Selectivity (mol \%)} = \frac{\text{total moles carbon of product component}}{\text{total moles carbon of all product components}} \times 100$$

The yield is the molar fraction of a particular product formed to the total number of moles of feed introduced:

$$\text{Yield (mol \%)} = \frac{\text{Selectivity of product component} \times \text{conversion}}{100}$$

The gas hourly space velocity (GHSV) was calculated as follows:

$$\text{Gas hourly space velocity, GHSV (h}^{-1}\text{)} = \frac{\text{total flow rate into the reactor}}{\text{volume of the catalyst used}}$$

The carbon balance of each reaction was determined as below :

$$\text{Carbon balance} = \frac{\text{moles of carbon in}}{\text{moles of carbon out}} \times 100$$

## S2. Calculation of response factors (RF):

Assign *n*-octane a RF of 1 and calculate all other Response Factors relative to this:

Mass of *n*-octane in standard solution = 0.0073 g

Mass of *trans*-2-octene in standard solution = 0.00715g

Injection volume = 0.1  $\mu$ l

Peak area of *n*-octane = 46684.56

Peak area of *trans*-2-octene = 51712.54

The RF of *n*-octane was considered as 1 and Response Factor calculations was carried out relative to *n*-octane

Mass of *n*-octane in standard solution = 0.0075

Mass of *trans* 2-octene in standard solution= 0.00715

Injection volume= 0.1 $\mu$ L

Peak area of *n*-octane= 46684.56

Peak area of *trans*-2-octene= 50712.21

$$\text{Response factor of trans-2-octene} = \frac{\text{peak area of trans-2-octene} \times \text{mass of n-octane}}{\text{mass of trans-2-octene} \times \text{peak area of n-octane}}$$

**Table A2.4 Relative response factor of *trans* 2-octene**

| Injection volume ( $\mu$ l) | Amount of <i>trans</i> 2-octene | Peak area of <i>trans</i> 2-octene | Amount of <i>n</i> -octane injected | Peak area of <i>n</i> -octane | Relative response factor (RF) |
|-----------------------------|---------------------------------|------------------------------------|-------------------------------------|-------------------------------|-------------------------------|
| 0.1                         | 0.00071                         | 51714,89                           | 0.000703                            | 46684.56                      | 0.91                          |
| 0.2                         | 0.00153                         | 113606.4                           | 0.001416                            | 94552.7                       | 0.9                           |
| 0.3                         | 0.00225                         | 158300.4                           | 0.002109                            | 136843.9                      | 0.91                          |
| 0.4                         | 0.00285                         | 229129.7                           | 0.002813                            | 205058.5                      | 0.91                          |

Average response factor of *trans* 2-octene= 0.91

**Table S1. Retention times, Response factors and gradient of the calibration graph of compounds**

| <b>Component</b>    | <b>R. T. (min)</b> | <b>R.F</b> | <b>Equation (y=..)</b> |
|---------------------|--------------------|------------|------------------------|
| 1-pentene           | 2.432              | 0.93       | 1.01E+14               |
| 2-methyl-2-propanol | 2.477              | 0.72       | 8.13E+14               |
| <i>n</i> -Pentane   | 2.37               | 0.76       | 8.81E+14               |
| 1-hexene            | 3.52               | 0.95       | 1.36E+14               |
| <i>n</i> -Hexane    | 3.692              | 0.93       | 1.32E+14               |
| Methylcyclopentane  | 4.311              | 0.92       | 1.24E+14               |
| <i>n</i> -Heptane   | 6.98               | 0.91       | 1.63E+14               |
| 2, 4-dimethylhexane | 8.97               | 0.94       | 1.79E+14               |
| Toluene             | 10.47              | 1.12       | 1.57E+14               |
| 4-methylheptane     | 11.72              | 1.14       | 1.83E+14               |
| 1, 7-octadiene      | 12.52              | 0.90       | 1.85E+14               |
| 1-octene            | 13.8               | 0.98       | 1.90E+14               |
| 3-octene            | 14.9               | 0.98       | 1.75E+14               |
| Trans-4-octene      | 14.53              | 0.97       | 1.83E+14               |
| <i>n</i> -Octane    | 15.26              | 1          | 1.82E+14               |
| Trans-2-octene      | 15.59              | 0.94       | 1.79E+14               |
| 1,3-octadiene       | 16.523             | 0.92       | 1.54E+14               |
| Ethyl cyclohexane   | 16.92              | 0.90       | 1.87E+14               |
| Propyl cyclopentane | 16.93              | 1 0.95     | 1.75E+14               |
| Ethyl benzene       | 17.58              | 1.13       | 1.93E+14               |
| Styrene             | 18.34              | 1.17       | 1.75E+14               |
| xylene              | 18.49              | 1.15       | 1.92E+14               |

|                            |        |      |          |
|----------------------------|--------|------|----------|
| cis-cyclooctene            | 18.829 | 1.20 | 1.78E+14 |
| cyclooctane                | 19.16  | 1.16 | 1.90E+14 |
| cis.cis-1,5-cyclooctadiene | 19.52  | 1.12 | 1.84E+14 |
| 4-octanone                 | 20.839 | 0.73 | 1.32E+14 |
| 3-octanone                 | 21.28  | 0.91 | 1.87E+14 |
| 2-octanone                 | 21.394 | 0.84 | 1.80E+14 |
| 3-octanol                  | 21.83  | 0.76 | 1.51E+14 |
| octanal                    | 21.84  | 0.71 | 1.40E+14 |
| 2-octanol                  | 21.992 | 0.78 | 1.46E+14 |
| octene oxide               | 22.244 | 0.85 | 1.61E+14 |
| benzyl alcohol             | 22.765 | 0.89 | 1.28E+14 |
| 1-octanol                  | 24.446 | 0.85 | 1.86E+14 |
| octanoic acid              | 26.396 | 0.61 | 1.23E+14 |

---



## S2. Determination of moles of *trans* 2-octene from a liquid organic sample

Mass of the organic layer = 1.786 g Percentage peak area of *trans* 2-octene = 0.91 Calculated

Response Factor = 1.0519

Corrected area = Percentage peak area  $\div$  Response factor =  $0.91 \div 1.0519 = 0.9677$

$$\text{Normalised area (\%)} = \frac{\text{corrected area}}{\text{Sum of corrected areas of all the products in sample}} \times 100$$
$$= 0.866$$

$$\begin{aligned} \text{Mass Component} &= \frac{\text{(g)} \\ &= \text{normalised area}}{100} \times \text{mass of organic layer} \\ &= \frac{(0.8601 \times 1.786)}{100} = 0.01525 \text{ gm} \end{aligned}$$

$$\begin{aligned} \text{Moles component out (moles)} &= \frac{\text{mass of component}}{\text{molar mass of component}} \\ &= \frac{0.01525}{112.21} = 0.000135 \end{aligned}$$

$$\begin{aligned} \text{Moles of carbon out} &= \text{moles component out} \times \text{carbon number} \\ &= 0.001087 \text{ moles of carbon} \end{aligned}$$

### S3. Determination of moles of butane from a gaseous organic sample

The gaseous samples were identified with the help of GCMS and their quantification was carried out by using methane as a standard gas by using the equation below

Initially, the constant was derived by using equation

$$\text{Constant} = (\text{Rf of methane} / \text{Area of methane}) \times \text{Vol. \% of methane}$$

The values obtained by injecting 0.2  $\mu\text{L}$  in the GC-FID are

Injection volume = 0.2  $\mu\text{L}$  Methane area = 90000

Methane Rf = 1

$$\text{Constant} = (1/90000) \times 0.02$$

$$= 2.22 \times 10^{-7}$$

Ethylene area from gaseous sample from reaction = 17629.91 Corrected area =

Area / Rf

$$= 17629.91/1$$

$$= 17629.91$$

Further, the corrected area was entered in the following formula to get the Mol. %, Mol. % = Corrected area  $\times$  constant  $\times$  (molecular weight of methane / molecular weight of unknown)

$$\text{Mol. \%} = 17629.91 \times 2.22 \times 10^{-7} \times (16/28) \text{ Mol \%} = 0.223871\%$$

Then, the volume of gas out was calculated from Mol. % Volume of gas out = Mol.

%  $\times$  gas out/min

$$= 0.223 \% \times 67 \text{ mL/min}$$

$$= 0.0538 \text{ mL/min}$$

Moles out were calculated by using ideal gas equation

$$PV=nRT$$

Where,

$$P= 10000 \text{ Pa}$$

$$V= 0.0538 \text{ ml/min}$$

$$R= 8.314 \text{ L kPa K}^{-1} \text{ mol}^{-1} \quad T= 298 \text{ K}$$

$$\text{Number of moles of ethylene} = 100000 \text{ Pa} \times 0.0538 \text{ ml/min} \times 0.000001 / (8.314 \text{ kPa K}^{-1}$$

$$\text{mol}^{-1} \times 298 \text{ K})$$

$$= 0.00000217$$

$$\text{Moles of Carbon} = 0.00000217 \times 2$$

$$= 0.00000434$$

$$\text{Total moles of Carbon} = 0.00000434 \times \text{Reaction time (min.)}$$

$$= 0.00000434 \times 120 \text{ min.}$$

$$= 0.00052$$
